# Supplementary material for: Back-to-Africa introductions of Mycobacterium tuberculosis as the main cause of tuberculosis in Dar es Salaam, Tanzania
Source: PubMed Central journal article supplement (PMC10104295; doi:10.1371/journal.ppat.1010893), 2023-04-04

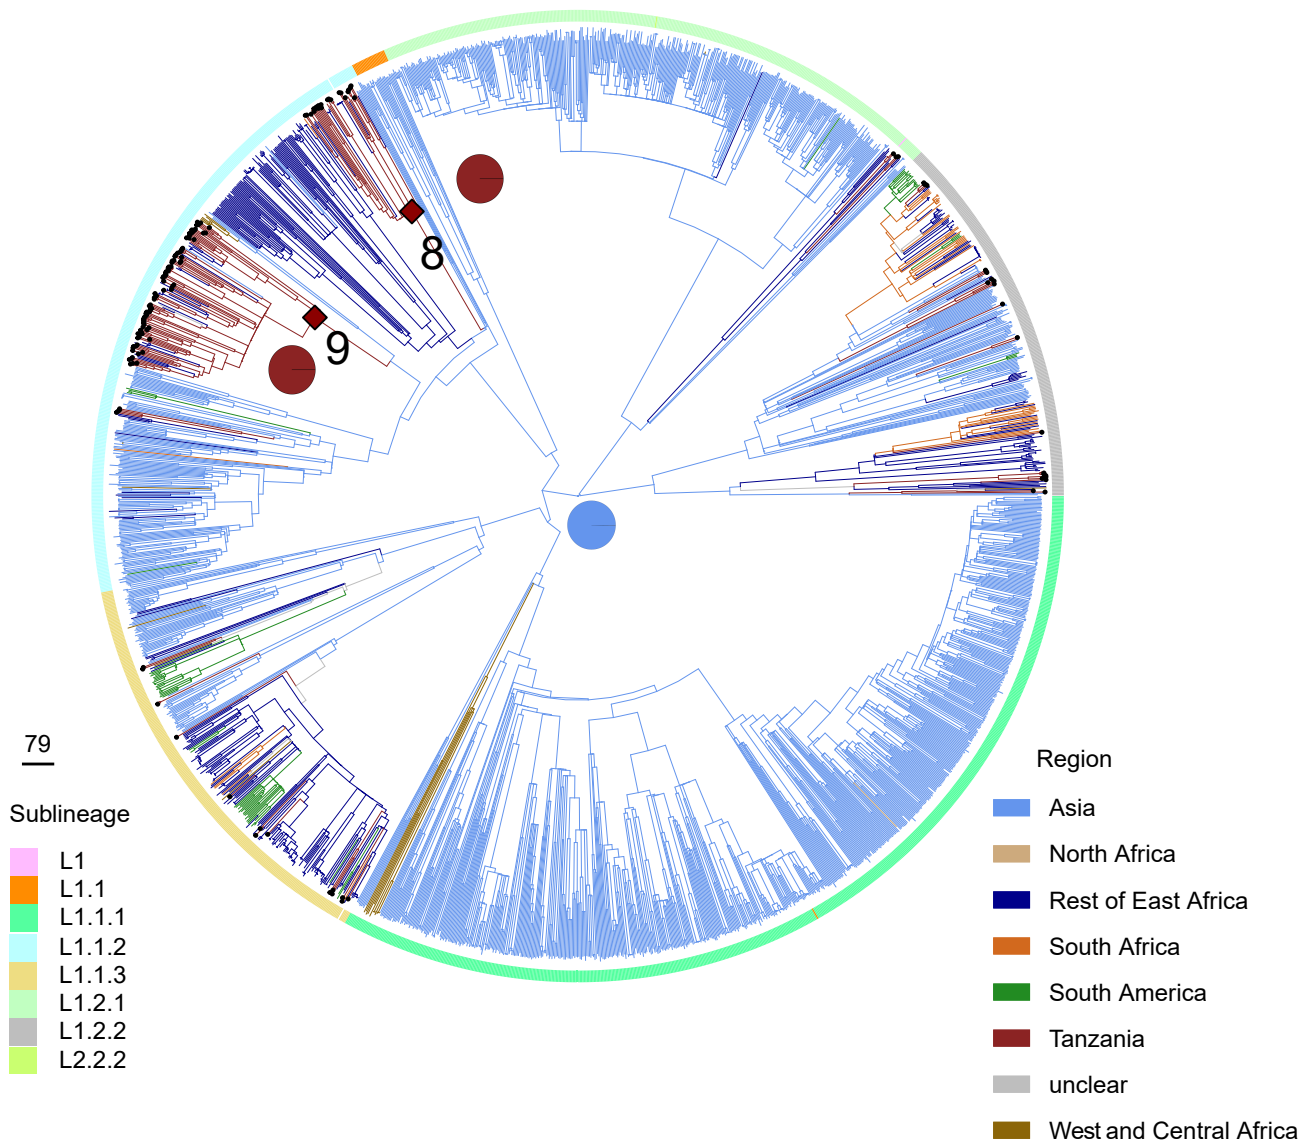

Supplement: ppat.1010893.s003.pdf [file ppat.1010893.s003.pdf]
