# Supplementary material for: Back-to-Africa introductions of Mycobacterium tuberculosis as the main cause of tuberculosis in Dar es Salaam, Tanzania
Source: PubMed Central journal article supplement (PMC10104295; doi:10.1371/journal.ppat.1010893), 2023-04-04
Supplement: ppat.1010893.s005.pdf [file ppat.1010893.s005.pdf]

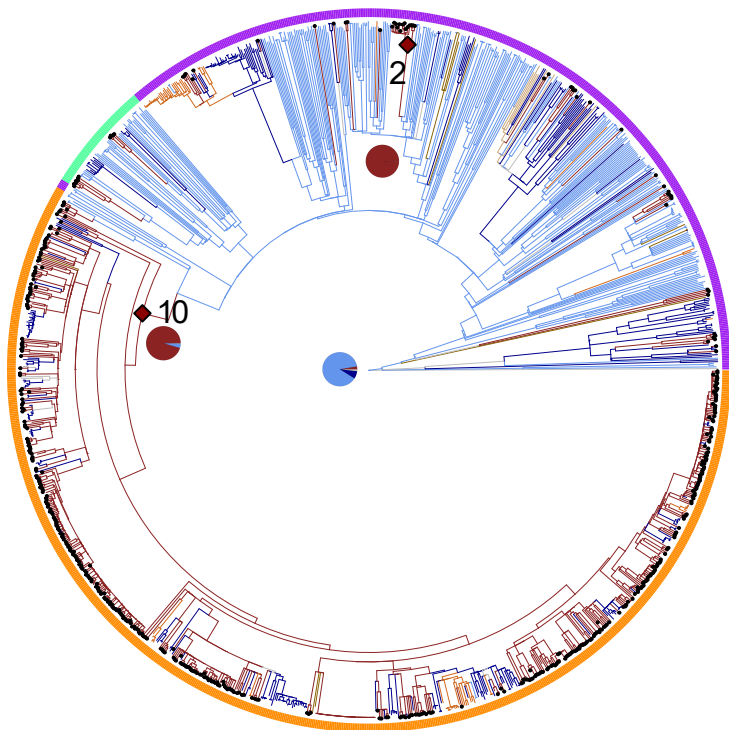

Sublineage

- L3
- L3.1.1
- L3.1.2

94

Region

- Asia
- North Africa
- Rest of East Africa
- South Africa
- Tanzania
- unclear
- West and Central Africa
