# Supplementary material for: Back-to-Africa introductions of Mycobacterium tuberculosis as the main cause of tuberculosis in Dar es Salaam, Tanzania
Source: PubMed Central journal article supplement (PMC10104295; doi:10.1371/journal.ppat.1010893), 2023-04-04

**A** L1 (n = 2,008)

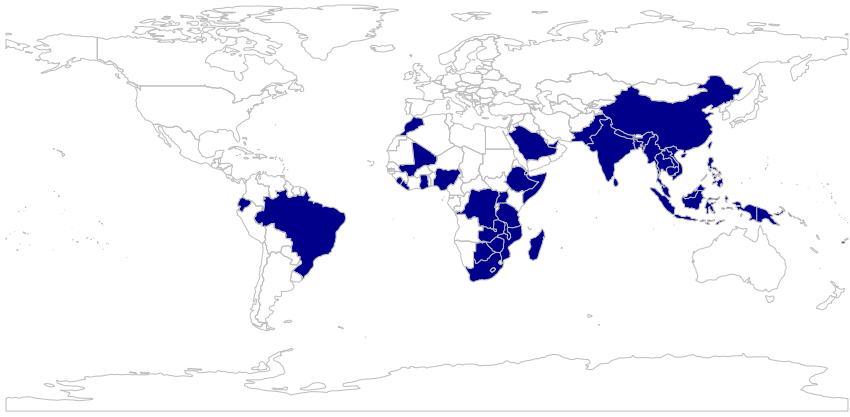

**B** L2 (n = 3,505)

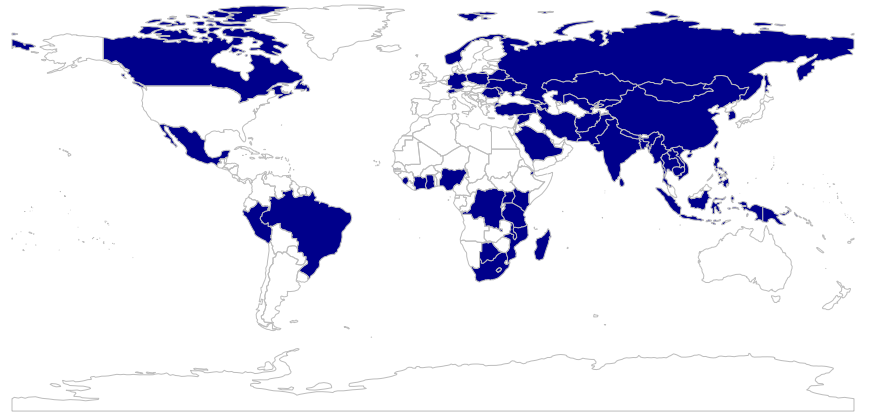

**C** L3 (n = 758)

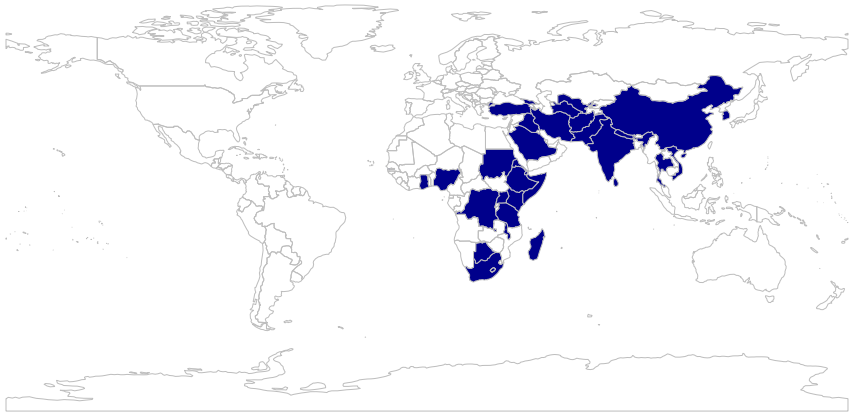

**D** L4 (n = 4,455)

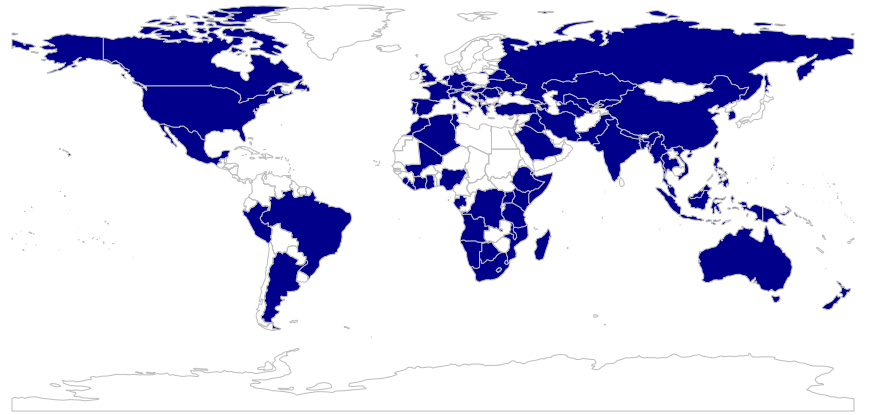

Supplement: ppat.1010893.s007.pdf [file ppat.1010893.s007.pdf]
